# Supplementary material
Source: Elsevier journal article supplement (https://www.sciencedirect.com/science/article/pii/S2530064419301750)
Supplement: mmc1 [file S2530064419301750:mmc1.docx]

**Endorsement of 407 scientists (including 391 PhD researchers from 79 Brazilian research institutions) to the manuscript:**

*“Why Brazil needs its Legal Reserves”*

Jean Paul Metzger, Mercedes M. C. Bustamante, Joice Ferreira, Geraldo Wilson Fernandes, Felipe Librán-Embid, Valério D. Pillar, Paula R. Prist, Ricardo Ribeiro Rodrigues, Ima Célia G. Vieira, Gerhard E. Overbeck, Perspectives in Ecology and Conservation, <https://doi.org/10.1016/j.pecon.2019.07.002>

**Statement by scientists and academics on the relevance of maintaining Legal Reserves in Brazil**

As scientists, and based on scientific evidence, we declare our support to the concerns expressed in the paper "Why Brazil needs its Legal Reserves”, by Jean Paul Metzger *et al*., published in "Perspectives in Ecology and Conservation". The Legal Reserve instrument, defined in the Brazilian Native Vegetation Protection Law (law12.651/2012), is of high importance for mitigation of climate change and protection of biodiversity and natural resources that provide benefits for human well-being.

The study critically evaluates arguments made in the justification of a recent bill that proposed to extinguish Legal Reserves. The analysis indicates that the arguments used in the bill are mostly not supported by evidence, data or theory. Additionally, the study presents a synthesis on the economic, social and ecological benefits of Legal Reserves.

Based on available scientific evidence and convinced of the importance of Legal Reserves, we are strongly opposed to all attempts to extinguish or weaken these areas.

| Abílio Soares Gomes, Universidade Federal Fluminense |
| --- |
| Adalberto Luis Val, Instituto Nacional de Pesquisas da Amazônia |
| Adalberto Vieyra, Universidade Federal do Rio de Janeiro |
| Adriana Bocchiglieri, Universidade Federal de Sergipe |
| Adriano Caliman Ferreira da Silva, Universidade Federal do Rio Grande do Norte |
| Adriano Garcia Chiarello, Universidade de São Paulo |
| Adriano Sanches Melo, Universidade Federal do Rio Grande do Sul |
| Alan Gerhardt Braz Magalhães, Universidade Federal do Rio de Janeiro |
| Aldicir Osni Scariot, Empresa Brasileira de Pesquisa Agropecuária |
| Alessandra Fernandes Bizerra, Universidade de São Paulo |
| Alessandra Giani, Universidade Federal de Minas Gerais |
| Alessandra Rodrigues Kozovits, Universidade Federal de Ouro Preto |
| Alex Enrich Prast, Universidade de Linkoping |
| Alexander Turra, Universidade de São Paulo |
| Alexandre Aleixo, University of Helsinki |
| Alexandre Fadigas de Souza, Universidade Federal do Rio Grande do Norte |
| Alexandre Reis Percequillo, Universidade de São Paulo |
| Alexandre Uezu, Instituto de Pesquisas Ecológicas |
| Alexandre Vogliotti, Universidade Federal da Integração Latino-Americana |
| Álvaro Brum Neto, Pontifícia Universidade Católica do Rio Grande do Sul |
| Ana Alice Aguiar Eleuterio, Universidade Federal da Integração Latino-Americana |
| Ana Carolina Lacerda de Matos, Universidade Federal de Lavras |
| Ana Cláudia Lira Guedes, Empresa Brasileira de Pesquisa Agropecuária |
| Ana Lucia Brandimarte, Universidade de São Paulo |
| Ana Luisa Albernaz, Museu Paraense Emílio Goeldi |
| Ana Margarida Castro Euler, Empresa Brasileira de Pesquisa Agropecuária |
| Ana Paula Mançano Guimarães, Universidade do Estado do Rio de Janeiro |
| Ana Paula Moreira Rovedder, Universidade Federal de Santa Maria |
| Anderson da Rocha Gripp, Universidade Federal de Rio de Janeiro  Anderson Saldanha Bueno, Instituto Federal de Educação, Ciência e Tecnologia Farroupilha |
| André Faria Mendonça, Universidade de Brasília |
| André Felippe Nunes-Freitas, Universidade Federal Rural do Rio de Janeiro |
| André Monnerat Lanna, Universidade Federal do Rio de Janeiro |
| Andrea Larissa Boesing, Universidade de São Paulo |
| Andrea Santarosa Freire, Universidade Federal de Santa Catarina |
| Andreas Kindel, Universidade Federal do Rio Grande do Sul |
| Angela Pierre Vitoria, Universidade Estadual do Norte Fluminense Darcy Ribeiro |
| Angelo Antonio Agostinho, Universidade Estadual de Maringá |
| Angelo Bernardino, Universidade Federal do Espírito Santo |
| Angelo Gilberto Manzatto, Universidade Federal de Rondônia |
| Antônio Carlos Marques, Universidade de São Paulo |
| Ariadna Valentina Lopes, Universidade Federal de Pernambuco |
| Augusto Alberto Valero Flores, Universidade de São Paulo |
| Augusto Schrank, Universidade Federal do Rio Grande do Sul |
| Aurea Regina Alves Ignacio, Universidade do Estado de Mato Grosso  Aureo Banhos dos Santos, Universidade Federal do Espírito Santo |
| Barbara Segal, Universidade Federal de Santa Catarina |
| Blandina Felipe Viana, Universidade Federal da Bahia |
| Braúlio Almeida Santos, Universidade Federal da Paraíba |
| Britaldo Silveira Soares Filho, Universidade Federal de Minas Gerais |
| Bruno Gualano, Universidade de São Paulo |
| Bruno Machado Teles Walter, Empresa Brasileira de Pesquisa Agropecuária |
| Camila C. Ribas, Instituto Nacional de Pesquisas da Amazônia |
| Camila dos Santos de Barros, Universidade Federal do Rio de Janeiro |
| Camila Ortolan O. F. Cervone, Universidade Estadual de Campinas |
| Carla Simone Pavanelli, Universidade Estadual de Maringá |
| Carla Suertegaray Fontana, Pontifícia Universidade Católica do Rio Grande do Sul |
| Carla Zilberberg, Universidade Federal do Rio de Janeiro |
| Carlos Afonso Nobre, Universidade de São Paulo |
| Carlos Alfredo Joly, Universidade Estadual de Campinas |
| Carlos Eduardo de Rezende, Universidade Estadual do Norte Fluminense Darcy Ribeiro |
| Carlos Eduardo de Viveiros Grelle, Universidade Federal do Rio de Janeiro |
| Carlos Eduardo Leite Ferreira, Universidade Federal Fluminense |
| Carlos Frederico Duarte Rocha, Universidade do Estado do Rio de Janeiro |
| Carlos Frederico Martins Menck, Universidade de São Paulo |
| Carlos Gustavo Tornquist, Universidade Federal do Rio Grande do Sul |
| Carlos Nabinger, Universidade Federal do Rio Grande do Sul |
| Carlos Roberto Fonseca, Universidade Federal do Rio Grande do Norte |
| Carolina Rodrigues da Costa Doria, Universidade Federal de Rondônia |
| Caroline Turchetto, Universidade Federal do Rio Grande do Sul |
| Célio Fernando Baptista Haddad, Universidade Estadual Paulista |
| Célio Ubirajara Magalhães Filho, Instituto Nacional de Pesquisas da Amazônia |
| Cesar Augusto M. M. Cordeiro, Universidade Federal Fluminense |
| Charbel El-Hani, Universidade Federal da Bahia |
| Charles Morphy Dias dos Santos, Universidade Federal do ABC |
| Christine Strüssmann, Universidade Federal de Mato Grosso |
| Cintia Cornelius, Universidade Federal do Amazonas |
| Clarissa Alves da Rosa, Instituto Nacional de Pesquisas da Amazônia |
| Clarissa Machado Pinto Leite, Universidade Federal da Bahia |
| Claudia Costa Bonecker, Universidade Estadual de Maringá |
| Claudio Roberto Anholetto Junior, Universidade de São Paulo |
| Cleto Kaveski Peres, Universidade Federal da Integração Latino-Americana |
| Cristiana Simão Seixas, Universidade Estadual de Campinas |
| Cristiane Prado Scott dos Santos, Universidade Estadual de Campinas |
| Cristiano Roberto Buzatto, Universidade de Passo Fundo |
| Cristina Adams, Universidade de São Paulo |
| Cristina Yumi Miyaki, Universidade de São Paulo |
| Daniel Luis Mascia Vieira, Empresa Brasileira de Pesquisa Agropecuária |
| Daniela Lopes Scarpa, Universidade de São Paulo |
| Daniela Oliveira de Lima, Universidade Federal da Fronteira Sul |
| Daniele Cristina Barcelos, Instituto de Desenvolvimento Sustentável Mamirauá |
| Danielle Celentano, Universidade Estadual do Maranhão |
| Danilo Bandini Ribeiro, Universidade Federal de Mato Grosso do Sul |
| David Montenegro Lapola, Universidade Estadual de Campinas |
| Demetrio Luis Guadagnin, Universidade Federal do Rio Grande do Sul |
| Denise de Cerqueira Rossa Feres, Universidade Estadual Paulista |
| Denise Helena Silva Duarte, Universidade de São Paulo |
| Denise Pinheiro da Costa, Jardim Botânico do Rio de Janeiro |
| Dilermando Pereira Lima Junior, Universidade Federal de Mato Grosso |
| Diogo Borges Provete, Universidade Federal de Mato Grosso do Sul |
| Domingos de Jesus Rodrigues, Universidade Federal de Mato Grosso |
| Dora Maria Villela, Universidade Estadual do Norte Fluminense Darcy Ribeiro |
| Edlley Max Pessoa da Silva, Universidade Federal de Mato Grosso |
| Edson Vidal, Universidade de São Paulo |
| Eduardo Delgado Assad, Empresa Brasileira de Pesquisa Agropecuária |
| Eduardo Fernando dos Santos, Universidade Estadual Paulista |
| Eduardo Luís Hettwer Giehl, Universidade Federal de Santa Catarina |
| Eduardo Mariano Neto, Universidade Federal da Bahia |
| Eduardo Martins Ventiicinque, Universidade Federal do Rio Grande do Norte |
| Eduardo Resende Secchi, Universidade Federal do Rio Grande |
| Eduardo Vélez Martin, ILEX Consultoria Científica  Eduardo Viola, Universidade de Brasília |
| Elcida de Lima Araújo, Universidade Federal Rural de Pernambuco |
| Eleonora Trajano, Universidade de São Paulo e Universidade Federal de São Carlos |
| Eleonore Zulnara Freire Setz, Universidade Estadual de Campinas |
| Eliana Nakano, Instituto Butantan |
| Eliane Gonçalves de Freitas, Universidade Estadual Paulista |
| Eliseu José Weber, Universidade Federal do Rio Grande do Sul |
| Elizeu Barbosa de Castro, Universidade Estadual Paulista |
| Elliot W. Kitajima, Universidade de São Paulo |
| Emerson M. Vieira, Universidade de Brasília |
| Ênio Egon Sosinski Júnior, Empresa Brasileira de Pesquisa Agropecuária |
| Enrico Bernard, Universidade Federal de Pernambuco |
| Erich Arnold Fischer, Universidade Federal de Mato Grosso do Sul |
| Everton Nei Lopes Rodrigues, Universidade do Vale do Rio do Sinos |
| Fabio de Oliveira Roque, Universidade Federal de Mato Grosso do Sul |
| Fábio Pinheiro, Universidade Estadual de Campinas |
| Fábio Roland, Universidade Federal de Juiz de Fora |
| Fabio Rubio Scarano, Universidade Federal do Rio de Janeiro |
| Fausto Nomura, Universidade Federal de Goiás |
| Felipe P. L. Melo, Universidade Federal de Pernambuco |
| Fernanda de Pinho Werneck, Instituto Nacional de Pesquisas da Amazônia e Harvard University |
| Fernanda Pozzan Paim, Instituto de Desenvolvimento Sustentável Mamirauá |
| Fernanda Zimmermann Teixeira, Universidade Federal do Rio Grande do Sul |
| Fernando A. S. Fernandez, Universidade Federal do Rio de Janeiro |
| Fernando Augusto Oliveira Silveira, Universidade Federal de Minas Gerais |
| Fernando Gertum Becker, Universidade Federal do Rio Grande do Sul |
| Fernando Joner, Universidade Federal de Santa Catarina |
| Fernando Pedroni, Universidade Federal de Mato Grosso |
| Fernando Roberto Martins, Universidade Estadual de Campinas |
| Fernando Rogério de Carvalho, Universidade Federal de Mato Grosso do Sul |
| Fernando Zagury Vaz de Mello, Universidade Federal de Mato Grosso |
| Flávia Regina Capellotto Costa, Instituto Nacional de Pesquisas da Amazônia |
| Flavio Antonio Maës dos Santos, Universidade Estadual de Campinas |
| Francisca Soares de Araujo, Universidade Federal do Ceará |
| Francisco Diogo Rocha Souza, Universidade Federal de Goiás |
| Gabriel Zorello Laporta, Faculdade de Medicina do ABC |
| Gabriela Marques Di Giulio, Universidade de São Paulo |
| Gabriela Zuquim, Universidade de Turku, Finlândia |
| Geraldo Luiz Gonçalves Soares, Universidade Federal do Rio Grande do Sul |
| Gerd Sparovek, Universidade de São Paulo |
| Gerson Paulino Lopes, Instituto de Desenvolvimento Sustentável Mamirauá |
| Gilberto José de Moraes, Universidade de São Paulo |
| Gilda Vasconcellos de Andrade, Universidade Federal do Maranhão |
| Gisele Regina Winck, Université Grenoble Alpes |
| Guaracira Gouvea de Sousa, Universidade Federal do Estado do Rio de Janeiro |
| Guilherme Andrade Marson, Universidade de São Paulo |
| Gustavo Quevedo Romero, Universidade Estadual de Campinas |
| Heinrich Hasenack, Universidade Federal do Rio Grande do Sul |
| Helder Lima Queiroz, Instituto de Desenvolvimento Sustentável Mamirauá |
| Helena Alves Pinto, Universidade Federal do Rio de Janeiro |
| Helena Godoy Bergallo, Universidade do Estado do Rio de Janeiro |
| Helena Piccoli Romanowski, Universidade Federal do Rio Grande do Sul |
| Heraldo Luis de Vasconcelos, Universidade Federal de Uberlândia |
| Hermes José Schmitz, Universidade Federal da Integração Latino-Americana |
| Igor Luis Kaefer, Universidade Federal do Amazonas |
| Ilsi Iob Boldrini, Universidade Federal do Rio Grande do Sul |
| Isabel Alves do Santos, Universidade de São Paulo |
| Isabel Belloni Schmidt, Universidade de Brasília |
| Isabela Galarda Varassin, Universidade Federal do Paraná |
| Ismael Franz, Pontifícia Universidade Católica do Rio Grande do Sul |
| Iury Valente Debien, Instituto de Desenvolvimento Sustentável Mamirauá  Jader Marinho-Filho, Universidade de Brasília |
| Jayme Augusto Prevedello, Universidade do Estado do Rio de Janeiro |
| Jean Pierre Ometto, Instituto Nacional de Pesquisas Espaciais |
| Jean Ricardo Simões Vitule, Universidade Federal do Paraná |
| Jerry Magno Ferreira Penha, Universidade Federal de Mato Grosso |
| Jéssica Luiza Souza e Silva, Universidade Federal de Pernambuco |
| João André Jarenkow, Universidade Federal do Rio Grande do Sul |
| João Carlos de Castro Pena, Universidade Estadual Paulista |
| João Carlos Ferreira de Melo Júnior, Universidade da Região de Joinville |
| Joao Henrique Ghilardi Lago, Universidade Federal do ABC |
| João Valsecchi do Amaral, Instituto de Desenvolvimento Sustentável Mamirauá |
| João Vasconcellos Neto, Universidade Estadual de Campinas |
| Jocelia Grazia, Universidade Federal do Rio Grande do Sul |
| Jorge Luiz Pereira de Souza, Instituto Nacional da Mata Atlântica |
| Jorge Luiz Waechter, Universidade Federal do Rio Grande do Sul |
| José Acélio Silveira da Fontoura Júnior, Universidade Federal do Pampa |
| Jose Felipe Ribeiro, Empresa Brasileira de Pesquisa Agropecuária |
| José Galizia Tundisi, Instituto Internacional de Ecologia |
| José Henrique Fortes Mello, Jardim Botânico do Rio de Janeiro |
| José Julio Toledo, Universidade Federal do Amapá |
| José Luiz Attayde, Universidade Federal do Rio Grande do Norte |
| José Marcelo D. Torezan, Universidade Estadual de Londrina |
| José Sabino, Universidade Anhanguera - Uniderp |
| Julia de Niemeyer Caldas, Universidade Federal do Rio de Janeiro |
| Júlia Lins Luz, Universidade Federal do Rio de Janeiro |
| Juliano André Bogoni, Universidade de São Paulo |
| Juliano Morales de Oliveira, Universidade do Vale do Rio dos Sinos |
| Kaline de Mello, Universidade de São Paulo |
| Katia Maria Paschoaletto Micchi de Barros Ferraz, Universidade de São Paulo |
| Kayna Agostini, Universidade Federal de São Carlos |
| Kleber Del Claro, Universidade Federal de Uberlândia |
| Laerte Guimaraes Ferreira Jr., Universidade Federal de Goiás |
| Laszlo Karoly Nagy, Universidade Estadual de Campinas |
| Laura Verrastro Vinas, Universidade Federal do Rio Grande do Sul |
| Laurence Marianne Vincianne Culot, Universidade Estadual Paulista |
| Lauro E. S. Barata, Universidade Federal do Oeste do Pará |
| Leandra R. Gonçalves, Universidade de São Paulo |
| Leandro Bugoni, Universidade Federal do Rio Grande |
| Leandro Valle Ferreira, Museu Paraense Emílio Goeldi |
| Leonardo Maltchik, Universidade do Vale do Rio dos Sinos |
| Leonor Costa Maia, Universidade Federal de Pernambuco |
| Leonor Patrícia Cerdeira Morellato, Universidade Estadual Paulista |
| Letícia Couto Garcia, Universidade Federal de Mato Grosso do Sul |
| Liana de Figueiredo Mendes, Universidade Federal do Rio Grande do Norte |
| Lilian Casatti, Universidade Estadual Paulista |
| Lívia Peluso Azevedo, Universidad Austral de Chile |
| Lucas M. Aguiar, Universidade Federal da Integração Latino-Americana |
| Luciana da Silva Menezes, Universidade Federal do Rio Grande do Sul |
| Luciana Regina Podgaiski, Universidade Federal do Rio Grande do Sul |
| Luciano Martins Verdade, Universidade de São Paulo |
| Ludgero Cardoso Galli Vieira, Universidade de Brasília |
| Ludmilla M. S. Aguiar, Universidade de Brasília |
| Luís Fábio Silveira, Universidade de São Paulo |
| Luís Felipe Toledo, Universidade Estadual de Campinas |
| Luísa Mafalda Gigante Rodrigues Carvalheiro, Universidade Federal de Goiás |
| Luiz Antonio Martinelli, Universidade de São Paulo |
| Luiz Carlos de Pinho, Universidade Federal de Santa Catarina |
| Luiz Drude de Lacerda, Universidade Federal do Ceará |
| Luiz Roberto Malabarba, Universidade Federal do Rio Grande do Sul |
| Luiz Roberto Ribeiro Faria Junior, Universidade Federal da Integração Latino-Americana |
| Manuel Eduardo Ferreira, Universidade Federal de Goiás |
| Manuela Carneiro da Cunha, Universidade de São Paulo |
| Mara Rejane Ritter, Universidade Federal do Rio Grande do Sul |
| Marcelino Carneiro Guedes, Empresa Brasileira de Pesquisa Agropecuária |
| Marcelo Corrêa Bernardes, Universidade Federal Fluminense |
| Marcelo F. Simon, Empresa Brasileira de Pesquisa Agropecuária |
| Marcelo Giordan, Universidade de São Paulo |
| Marcelo Malysz, Universidade Federal da Fronteira Sul |
| Marcelo Menin, Universidade Federal do Amazonas |
| Marcelo Roberto Souto de Melo, Universidade de São Paulo |
| Marcelo Tabarelli, Universidade Federal de Pernambuco |
| Marcelo Tadeu Motokane, Universidade de São Paulo |
| Marcelo Trindade Nascimento, Universidade Estadual do Norte Fluminense Darcy Ribeiro |
| Marcia C. M. Marques, Universidade Federal do Paraná |
| Marcia Motta Maues, Empresa Brasileira de Pesquisa Agropecuária |
| Marcio Roberto Costa Martins, Universidade de São Paulo |
| Marcio Sabbadini Francisco, Instituto de Desenvolvimento Sustentável Mamirauá  Márcio Zikán Cardoso, Universidade Federal do Rio Grande do Norte |
| Marco Aurelio Pizo, Universidade Estadual Paulista |
| Marcos Callisto, Universidade Federal de Minas Gerais |
| Marcos José Salgado Vital, Universidade Federal de Roraima |
| Marcos Silveira Buckeridge, Universidade de São Paulo |
| Marcos Vogel, Universidade Federal do Espírito Santo |
| Marcus Vinicius Cianciaruso, Universidade Federal de Goiás |
| Marcus Vinícius Vieira, Universidade Federal do Rio de Janeiro |
| Margareth da Silva Copertino, Universidade Federal do Rio Grande |
| Margareth Peixoto Maia, Instituto Mãos da Terra |
| Maria Alice dos Santos Alves, Universidade do Estado do Rio de Janeiro |
| Maria Cecilia Rosinski Lima Gomes, Instituto de Desenvolvimento Sustentável Mamirauá |
| Maria João Ramos Pereira, Universidade Federal do Rio Grande do Sul |
| Maria Lucia Carneiro Vieira, Universidade de São Paulo |
| Maria Paula Correia de Souza, Percebe - Pesquisa, consultoria e treinamento educacional |
| Maria Stela Maioli Castilho Noll, Universidade Estadual Paulista |
| Maria Teresa Fernandez Piedade, Instituto Nacional de Pesquisas da Amazônia |
| Mariana Cabral de Oliveira, Universidade de São Paulo |
| Mariana Iguatemy, Secretaria de Estado do Ambiente e Sustentabilidade |
| Mariana Moncassim Vale, Universidade Federal do Rio de Janeiro |
| Mariella C. Uzeda, Empresa Brasileira de Pesquisa Agropecuária |
| Marina Hirota, Universidade Federal de Santa Catarina |
| Mario Barletta, Universidade Federal de Pernambuco |
| Mario de Pinna, Universidade de São Paulo |
| Marlucia Bonifacio Martins, Museu Paraense Emílio Goeldi |
| Marta Regina Barrotto do Carmo, Universidade Estadual de Ponta Grossa |
| Martín Pareja, Universidade Estadual de Campinas |
| Mathias Mistretta Pires, Universidade Estadual de Campinas |
| Mauro Bertotti, Universidade de São Paulo |
| Mauro Galetti, Universidade Estadual Paulista |
| Michel Varajão Garey, Universidade Federal da Integração Latino-Americana |
| Michele de Sá Dechoum, Universidade Federal de Santa Catarina |
| Miguel Ângelo Marini, Universidade de Brasília |
| Miguel Dall'Agnol, Universidade Federal do Rio Grande do Sul |
| Miguel Trefaut Rodrigues, Universidade de São Paulo |
| Milton Cezar Ribeiro, Universidade Estadual Paulista |
| Milton de Souza Mendonça Junior, Universidade Federal do Rio Grande do Sul |
| Miriam Marmontel, Instituto de Desenvolvimento Sustentável Mamirauá |
| Míriam Plaza Pinto, Universidade Federal do Rio Grande do Norte |
| Monica Kersch-Becker, University of Alabama |
| Mônica Tallarico Pupo, Universidade de São Paulo |
| Murilo S. Dias, Universidade de Brasília |
| Naércio Aquino Menezed, Universidade de São Paulo |
| Natalia Hanazaki, Universidade Federal de Santa Catarina |
| Nathan D. Vogt, Universidade do Vale do Paraíba |
| Nelio Bizzo, Universidade de São Paulo |
| Nelson Ferreira Fontoura, Pontifícia Universidade Católica do Rio Grande do Sul |
| Neri de Barros Almeida, Universidade Estadual de Campinas |
| Neusa Hamada, Instituto Nacional de Pesquisas da Amazônia |
| Newton Pimentel de Ulhôa Barbosa, UNA |
| Nina Attias, Universidade Federal de Mato Grosso do Sul |
| Nivaldo Peroni, Universidade Federal de Santa Catarina |
| Norberto Peporine Lopes, Universidade de São Paulo |
| Orliney Maciel Guimarães, Universidade Federal do Paraná |
| Oswaldo Cruz Neto, Universidade Federal de Pernambuco |
| Otavio Henrique Thiemann, Universidade de São Paulo |
| Paschoal Grossi, Universidade Federal Rural de Pernambuco |
| Patrícia Domingos, Universidade do Estado do Rio de Janeiro |
| Patricia Jacqueline Thyssen, Universidade Estadual de Campinas |
| Paula Felício Drummond de Castro, Universidade Estadual de Campinas |
| Paulo Alves Porto, Universidade de São Paulo |
| Paulo Antunes Horta, Universidade Federal de Santa Catarina |
| Paulo Artaxo, Universidade de São Paulo |
| Paulo da Cunha Lana, Universidade Federal do Paraná |
| Paulo De Marco Júnior, Universidade Federal de Goiás |
| Paulo dos Santos Pompeu, Universidade Federal de Lavras |
| Paulo E. Diaz Rocha, Universidade de São Paulo |
| Paulo Mauricio Lima de Alencastro Graça, Instituto Nacional de Pesquisas da Amazônia |
| Paulo Roberto Guimarães Junior, Universidade de São Paulo |
| Paulo Saldiva, Universidade de São Paulo |
| Paulo Sergio D'Andrea, Instituto Oswaldo Cruz/Fiocruz |
| Paulo Yukio Gomes Sumida, Universidade de São Paulo |
| Pedro Brancalion, Universidade de São Paulo |
| Pedro Fiaschi, Universidade Federal de Santa Catarina |
| Pedro Henrique Brum Togni, Universidade de Brasília |
| Pedro Lage Viana, Museu Paraense Emílio Goeldi |
| Pedro Luís Bernardo da Rocha, Universidade Federal da Bahia |
| Pedro Maria de Abreu Ferreira, Pontifícia Universidade Católica do Rio Grande do Sul |
| Pedro Roberto Jacobi, Universidade de São Paulo |
| Peter Stoltenborg Groenendyk, Universidade Estadual de Campinas |
| Priscila F. M. Lopes, Universidade Federal do Rio Grande do Norte |
| Rachel Bardy Prado, Empresa Brasileira de Pesquisa Agropecuária |
| Rachel Fatima Gagliardi Araujo, Universidade do Estado do Rio de Janeiro |
| Rafael Antunes Dias, Universidade Federal de Pelotas |
| Rafael de Paiva Salomão, Universidade Federal Rural da Amazônia e Museu Paraense Emílio Goeldi |
| Rafael Loyola, Universidade Federal de Goiás |
| Rafael Magalhães Rabelo, Instituto Nacional de Pesquisas da Amazônia |
| Rafael Silva Oliveira, Universidade Estadual de Campinas |
| Rafaella Guimaraes Porto, Universidade Federal de Pernambuco |
| Raoni Rajão, Universidade Federal de Minas Gerais |
| Raul Ramos, Universidade Estadual Paulista |
| Regina Helena Ferraz Macedo, Universidade de Brasília |
| Regina Oliveira da Silva, Museu Paraense Emílio Goeldi |
| Reinaldo F. F. Lourival, Nature and Culture International |
| Reinaldo Imbrozio Barbosa, Instituto Nacional de Pesquisas da Amazônia |
| Reinaldo José Fazzio Feres, Universidade Estadual Paulista |
| Renata Pardini, Universidade de São Paulo |
| Renato Cordeiro, Instituto Oswaldo Cruz/Fiocruz |
| Renato Crouzeilles, Instituto Internacional de Sustentabilidade |
| Renato Torres Pinheiro, Universidade Federal do Tocantins |
| Ricardo Bomfim Machado, Universidade de Brasília |
| Robaldo Bastos Francini Filho, Universidade Federal da Paraíba |
| Roberto Esser dos Reis, Pontifícia Universidade Católica do Rio Grande do Sul |
| Roberto Gomes de Souza Berlinck, Universidade de São Paulo |
| Roberto Schaeffer, Universidade Federal do Rio de Janeiro |
| Rodolfo Jaffé, Instituto Tecnológico Vale Desenvolvimento Sustentavel |
| Rodrigo Damasco Daud, Universidade Federal de Goiás |
| Rodrigo Ferreira Fadini, Universidade Federal do Oeste do Pará |
| Rogério R. Silva, Museu Paraense Emílio Goeldi |
| Rogério Ribeiro de Oliveira, Pontifícia Universidade Católica do Rio Grande do Sul |
| Ronaldo Bastos Francini Filho, Universidade Federal da Paraíba |
| Rosana Tidon, Universidade de Brasília |
| Rosane Collevatti, Universidade Federal de Goiás |
| Rosemeri Segecin Moro, Universidade Estadual de Ponta Grossa |
| Rui Barbosa da Rocha, Universidade Estadual de Santa Cruz |
| Rui Cerqueira, Universidade Federal do Rio de Janeiro |
| Sandra Maria Hartz, Universidade Federal do Rio Grande do Sul |
| Sandra Müller, Universidade Federal do Rio Grande do Sul |
| Santiago Jose Castroviejo Fisher, Pontifícia Universidade Católica do Rio Grande do Sul |
| Selvino Neckel-Oliveira, Universidade Federal de Santa Catarina |
| Sergio R. Floeter, Universidade Federal de Santa Catarina |
| Sidinei Magela Thomaz, Universidade Estadual de Maringá |
| Silvia Renate Ziller, Instituto Hórus de Desenvolvimento e Conservação Ambiental |
| Silvio Frosini de Barros Ferraz, Universidade de São Paulo |
| Simone Vieira, Universidade Estadual de Campinas |
| Suzana Alcantara, Universidade Federal de Santa Catarina |
| Tabatha Benitz, Instituto de Desenvolvimento Sustentável Mamirauá |
| Tatiana Maria Cecy Gadda, Universidade Tecnológica Federal do Paraná |
| Tatiana Teixeira de Souza Chies, Universidade Federal do Rio Grande do Sul |
| Teresa Cristina Sauer de Avila Pires, Museu Paraense Emílio Goeldi |
| Thadeu Sobral de Souza, Universidade Federal de Mato Grosso |
| Thaiane Weinert da Silva, Pontifícia Universidade Católica do Rio Grande do Sul |
| Thiago Gonçalves Souza, Universidade Federal Rural de Pernambuco |
| Thiago Junqueira Izzo, Universidade Federal de Mato Grosso |
| Thomas M. Lewinsohn, Universidade Estadual de Campinas |
| Tiago Filipe Steffen, Universidade Feevale |
| Tiago Gomes dos Santos, Universidade Federal do Pampa |
| Tiago S. Vasconcelos, Universidade Estadual Paulista |
| Tito Monteiro da Cruz Lotufo, Universidade de São Paulo |
| Tsai Siu Mui, Universidade de São Paulo |
| Uwe Horst Schulz, Universidade do Vale do Rio dos Sinos |
| Vanderlan da Silva Bolzani, Universidade Estadual Paulista |
| Vanessa Graziele Staggemeier, Universidade Federal do Rio Grande do Norte |
| Vania Regina Pivello, Universidade de São Paulo |
| Vera Lucia Imperatriz Fonseca, Instituto Tecnológico Vale Desenvolvimento Sustentavel |
| Vera Maria Fonseca de Almeida e Val, Instituto Nacional de Pesquisas da Amazônia |
| Vera Nisaka Solferini, Universidade Estadual de Campinas |
| Verônica Parente Gomes de Araujo, Universidade do Estado do Rio de Janeiro |
| Vinicius Fortes Farjalla, Universidade Federal do Rio de Janeiro |
| Vinicius José Giglio, Universidade Federal de São Paulo |
| Vitor Nelson Teixeira Borges Júnior, Universidade Federal do Rio de Janeiro |
| Walfrido Moraes Tomas, Empresa Brasileira de Pesquisa Agropecuária |
| Wesley Rodrigues Silva, Universidade Estadual de Campinas |
| Willams Oliveira, Universidade Federal de Pernambuco |
| William Ernest Magnusson, Instituto Nacional de Pesquisas da Amazônia |
| Wilson Cabral de Sousa Junior, Instituto Tecnológico de Aeronáutica |
| Yasmine Antonini, Universidade Federal de Ouro Preto |
| Yule Roberta Ferreira Nunes, Universidade Estadual de Montes Claros |
